# Supplementary material for: An autologous dendritic cell vaccine polarizes a Th-1 response which is tumoricidal to patient-derived breast cancer cells
Source: Springer Nature journal article supplement (doi:10.1007/s00262-018-2238-5), 2018-10-03
Supplement: 262_2018_2238_MOESM1_ESM.pdf [file 262_2018_2238_MOESM1_ESM.pdf]

## Results.

**Table S1: Expression of co-stimulatory molecules and viability of mature DCs post 2 months of cryopreservation.**

| Mean co-stimulatory molecule expression post cryopreservation (%) |               |               |               | GMP testing        |                                |            |            |
|-------------------------------------------------------------------|---------------|---------------|---------------|--------------------|--------------------------------|------------|------------|
| CD80                                                              | CD86          | CCR7          | CD83          | Mean viability (%) | Sterility (bacterial/mycology) | Endotoxins | Mycoplasma |
| 84<br>(70-90)                                                     | 86<br>(72-91) | 68<br>(53-70) | 77<br>(63-85) | 74 (60-84)         | Yes                            | No         | No         |

GMP = good manufacturing practice.
